# Supplementary material
Source: publisher site journal article supplement (https://www.dovepress.com/get_supplementary_file.php?f=412241.docx)
Supplement: Supplementary file 1 [file get_supplementary_file.php]

**Supplementary Table 1:** Socio-demographic related characteristics of fresh moringa leaf consumers and non-consumers pregnant women in Southern Ethiopia

| Variable | Frequency (%) | Consumer  No (%) | Non-consumer  No (%) | p-value |
| --- | --- | --- | --- | --- |
| Maternal age |  |  |  | 0.01 |
| 18 - 23 years | 177(38.48) | 113(49.13) | 64(27.83) |
| 24 to 34 years | 266(57.83) | 112(48.70) | 154(66.96) |
| 35-38 years | 17(3.70) | 5(2.17) | 12(5.22) |
| Place of residence |  |  |  | 0.01 |
| Rural | 280(60.87) | 174(75.65) | 106(46.09) |
| Urban | 180(39.13) | 56(24.35) | 124(53.91) |
| Maternal religion |  |  |  | 0.01 |
| Orthodox | 100(21.79) | 27(11.79) | 73(31.74) |
| Protestant | 359(78.21) | 202(88.21) | 157(68.26) |
| Marital status |  |  |  | 0.37 |
| Married | 458(99.57) | 229(99.57) | 229(99.57) |
| Other | 2(0.43) | 1(0.43) | 1(0.43) |
| Maternal Educational Status |  |  |  | 0.02 |
| No formal education | 88(19.13) | 30(13.04) | 58(25.22) |
| Grade 1-4 | 86(18.70) | 45(19.57) | 41(17.83) |
| Grade 5-8 | 119(25.87) | 66(28.70) | 53(23.04) |
| Grade 9-12 | 124(26.96) | 67(29.13) | 57(24.78) |
| College and above | 43(9.35) | 22(9.57) | 21(9.13) |
| Husband Educational Status |  |  |  | 0.01 |
| No formal education | 73(15.87) | 29(11.15) | 44(16.92) |
| Grade 1-4 | 62(13.48) | 22(8.46) | 40(15.38) |
| Grade 5-8 | 132(28.70) | 75(28.85) | 57(21.92) |
| Grade 9-12 | 150(32.61) | 84(32.31) | 66(25.38) |
| College and above | 43(9.35) | 20(7.69) | 23(8.85) |
| Maternal occupational status |  |  |  | 0.01 |
| Governmental worker | 20(4.35) | 1(0.43) | 19(8.26) |
| Merchant | 59(12.83) | 32(13.91) | 27(11.74) |
| Student/Farmer | 16(3.48) | 9(3.91) | 7(3.04) |
| Housewife | 365(79.35) | 188(81.74) | 177(76.96) |
| Husband occupational status |  |  |  | 0.01 |
| Involved in craft-work | 163(35.43) | 34(14.78) | 129(56.09) |
| Farmer | 118(25.65) | 86(37.39) | 32(13.91) |
| Governmental worker | 53(11.52) | 23(10.00) | 30(13.04) |
| Merchant | 72(15.65) | 44(19.13) | 28(12.17) |
| Daily laborer | 54(11.74) | 43(18.70) | 11(4.78) |
| Number of Family members |  |  |  | 0.26 |
| Less than or equal to five | 402(87.39) | 205(89.13) | 197(85.65) |
| Greater than five | 58(12.61) | 25(10.87) | 33(14.35) |
| Number of under 5 children |  |  |  | 0.01 |
| No | 166(36.09) | 88(38.26) | 78(33.91) |
| One | 191(41.52) | 115(50.00) | 76(33.04) |
| Two | 103(22.39) | 27(11.74) | 76(33.04) |
| Wealth status |  |  |  | 0.01 |
| Lowest | 102(22.17) | 44(19.13) | 58(25.22) |
| Low | 85(18.48) | 41(17.83) | 44(19.13) |
| Medium | 91(19.78) | 33(14.35) | 58(25.22) |
| High | 91(19.78) | 49(21.30) | 42(18.26) |
| Highest | 91(19.78) | 63(27.39) | 28(12.17) |

**Supplementary Table 2:** Obstetric and health-related characteristics of fresh moringa leaf consumer and non-consumer among pregnant women in Southern Ethiopia

| Variable | Frequency (%) | Consumer  No (%) | Non-consumer  No (%) | p-value |
| --- | --- | --- | --- | --- |
| Age at first pregnancy |  |  |  |  |
| Less than 19 | 99 (21.52) | 66 (28.70) | 33 (14.35) | 0.01 |
| 19 to 24 | 313 (68.04) | 152 (66.09) | 161(70.00) |
| Greater than 24 | 48 (10.43) | 12 (5.22) | 36 (15.65) |
| Number of gravida |  |  |  |  |
| Primigravida | 113(24.57) | 58(25.22) | 55(23.91) | 0.19 |
| Multigravida | 306(66.52) | 157(68.26) | 149(64.78) |
| Grand multigravida | 41(8.91) | 15(6.52) | 26(11.30) |
| Number of para |  |  |  |  |
| Nulliparous | 145(31.52) | 74(32.17) | 71(30.87) | 0.01 |
| Primipara | 124(26.96) | 76(33.04) | 48(20.87) |
| Multipara | 172(37.39) | 71(30.87) | 101(43.91) |
| Grand multipara | 19(4.13) | 9(3.91) | 10(4.35) |
| Abortion before this pregnancy |  |  |  |  |
| No | 407(88.48) | 200(86.96) | 207(90.00) | 0.30 |
| Yes | 53(11.52) | 30(13.04) | 23(10.00) |
| Pregnancy status |  |  |  |  |
| Unplanned | 154(33.48) | 83(36.09) | 71(30.87) | 0.23 |
| Planned | 306(66.52) | 147(63.91) | 159(69.13) |
| Current ANC visit |  |  |  |  |
| No | 110(23.91) | 38(16.52) | 72(31.30) | 0.01 |
| Yes | 350(76.09) | 192(83.48) | 158(68.70) |
| Had Nausea/ vomiting |  |  |  |  |
| No | 218(47.39) | 107(46.52) | 111(48.26) | 0.70 |
| Yes | 242(52.61) | 123(53.48) | 119(51.74) |
| Had health problem |  |  |  |  |
| No | 427(92.83) | 204(88.70) | 223(96.96) | 0.01 |
| Yes | 33(7.17) | 26(11.30) | 7(3.04) |
| Anemia the during current pregnancy |  |  |  |  |
| No | 445(96.74) | 223(96.96) | 222(96.52) | 0.79 |
| Yes | 15(3.26) | 7(3.04) | 8(3.48) |
| Malaria attack in the current pregnancy |  |  |  |  |
| No | 420(91.30) | 194(84.35) | 226(98.26) | 0.01 |
| Yes | 40(8.70) | 36(15.65) | 4(1.74) |
| IP infection at current pregnancy |  |  |  |  |
| No | 439(95.43) | 212(92.17) | 227(98.70) | 0.01 |
| Yes | 21(4.57) | 18(7.83) | 3(1.30) |
| Bed net use |  |  |  |  |
| No | 292(63.48) | 72(31.30) | 220(95.65) | 0.01 |
| Yes | 168(36.52) | 158(68.70) | 10(4.35) |
| Bleeding during the current pregnancy |  |  |  |  |
| No | 451(98.04) | 224(97.39) | 227(98.70) | 0.31 |
| Yes | 9(1.96) | 6(2.61) | 3(1.30) |
| Knowledge on anemia |  |  |  |  |
| Don’t know signs & symptom | 219(47.61) | 55(23.91) | 164(71.30) | 0.01 |
| Know at least one sign & symptom | 241(52.39) | 175(76.09) | 66(28.70) |
| Don’t know the prevention method | 212(46.09) | 47(20.43) | 165(71.74) | 0.01 |
| Know at least one prevention method | 248(53.91) | 183(79.57) | 65(28.26) |
